# Supplementary material for: Characterising and understanding the impact of microbial biofilms and the extracellular polymeric substance (EPS) matrix in drinking water distribution systems
Source: Royal Society of Chemistry journal article supplement (doi:10.1039/c6ew00039h), 2016-01-01
Supplement: c6ew00039h1.pdf [file c6ew00039h1.pdf]

## Supplementary Information

1

2

3 **Table S 1 Examples of drinking water quality guidelines relating to microbial growth/regrowth,**  
 4 **as stated by various governing bodies** data collated from 15,14,151–153.

| Parameter                                                   | WHO Guidelines, 3 <sup>rd</sup> & 4 <sup>th</sup> <sup>rd</sup> Editions, (2004 & 2011) | EC Directive, 1998                        | U.K. Water Supply                         | US EPA Regulations under Safe Drinking Water Act 1996.         |
|-------------------------------------------------------------|-----------------------------------------------------------------------------------------|-------------------------------------------|-------------------------------------------|----------------------------------------------------------------|
| Arsenic (As)                                                | 0.010 mg l <sup>-1</sup>                                                                | 0.005 mg l <sup>-1</sup>                  | 0.005 mg l <sup>-1</sup>                  | 0.006 mg l <sup>-1</sup>                                       |
| Ammonium (NH <sub>4</sub> )                                 | -                                                                                       | 0.50 mg l <sup>-1</sup>                   | 0.50 mg l <sup>-1</sup>                   | -                                                              |
| Chloramines (NH <sub>2</sub> Cl, NHCl <sub>2</sub> )        | (max) 3 mg l <sup>-1</sup>                                                              | -                                         | -                                         | 4 mg l <sup>-1</sup> <sup>D</sup>                              |
| Chlorate (ClO <sub>3</sub> )                                | 0.7 mg l <sup>-1</sup>                                                                  | -                                         | 0.7 mg l <sup>-1</sup>                    | - <sup>D</sup>                                                 |
| Chlorine (Cl <sub>2</sub> )                                 | (max) 5 mg l <sup>-1</sup>                                                              | -                                         | “detectable”                              | “detectable” - 4 mg l <sup>-1</sup>                            |
| Copper (Cu)                                                 | 2 mg l <sup>-1</sup>                                                                    | 2 mg l <sup>-1</sup>                      | 2 mg l <sup>-1</sup>                      | 1.3 mg l <sup>-1</sup>                                         |
| Fluoride (F)                                                | 1.5 mg l <sup>-1</sup>                                                                  | 1.5 mg l <sup>-1</sup>                    | 1.5 mg l <sup>-1</sup>                    | 4 mg l <sup>-1</sup>                                           |
| Iron (Fe)                                                   | 0.3 mg l <sup>-1</sup>                                                                  | 200 µg l <sup>-1</sup>                    | 200 µg l <sup>-1</sup>                    | 0.3 mg l <sup>-1</sup> <sup>E</sup>                            |
| Lead (Pb)                                                   | 0.010 mg l <sup>-1</sup>                                                                | 0.010 mg l <sup>-1</sup>                  | 0.025 mg l <sup>-1</sup> <sup>C</sup>     | 0.015 mg l <sup>-1</sup>                                       |
| Manganese (Mn)                                              | 0.4 mg l <sup>-1</sup>                                                                  | 50 µg l <sup>-1</sup>                     | 50 µg l <sup>-1</sup>                     | 0.05 mg l <sup>-1</sup> <sup>E</sup>                           |
| Nitrate                                                     | 50 mg l <sup>-1</sup> as NO <sub>3</sub>                                                | 50 mg l <sup>-1</sup> as NO <sub>3</sub>  | 50 mg l <sup>-1</sup> as NO <sub>3</sub>  | 10 mg l <sup>-1</sup> as N                                     |
| Nitrite                                                     | 3 mg l <sup>-1</sup> as NO <sub>2</sub>                                                 | 0.5 mg l <sup>-1</sup> as NO <sub>2</sub> | 0.5 mg l <sup>-1</sup> as NO <sub>2</sub> | 1 mg l <sup>-1</sup> as N                                      |
| pH                                                          | -                                                                                       | ≥6.5 and ≤9.5                             | 6.5-9.5                                   | 6.5-8.5                                                        |
| Sodium (Na)                                                 | 200 mg l <sup>-1</sup>                                                                  | 200 mg l <sup>-1</sup>                    | 200 mg l <sup>-1</sup>                    | -                                                              |
| Sulphate                                                    | 250 mg l <sup>-1</sup>                                                                  | 250 mg l <sup>-1</sup>                    | 250 mg l <sup>-1</sup>                    | 250 mg l <sup>-1</sup> <sup>E</sup>                            |
| Total Organic Carbon (TOC)                                  | -                                                                                       | No abnormal change                        | No abnormal change                        | Varies with treatment technique                                |
| Turbidity                                                   | 5 NTU                                                                                   | 1-4 NTU                                   | 1-4 NTU                                   | 5 NTU                                                          |
| Colonies ml <sup>-1</sup> at 22 <sup>o</sup> C <sup>A</sup> | -                                                                                       | No abnormal change <sup>B</sup>           | No abnormal change <sup>B</sup>           | Requirement for surface water <500 colonies ml <sup>-1</sup>   |
| Colonies ml <sup>-1</sup> at 37 <sup>o</sup> C <sup>A</sup> | -                                                                                       | -                                         | No abnormal change <sup>B</sup>           |                                                                |
| Total coliforms <sup>A</sup>                                | -                                                                                       | 0/100 ml                                  | 0/100 ml <sup>C</sup>                     | Requirement for surface water, max contaminant level (MCL) <5% |
| <i>Escherichia coli</i> <sup>A</sup>                        | 0/100 ml                                                                                | 0/100 ml                                  | 0/100 ml                                  |                                                                |

5 <sup>A</sup> WHO and U.K. microbial guidelines are for water entering, within and leaving the DWDS, EC guidelines are for endpoint  
 6 water (i.e. water emerging from taps), US EPA regulations are for sites along the DWDS; <sup>B</sup> Indicator parameter; <sup>C</sup> 95% of  
 7 the last 50 samples taken must meet the standard; <sup>D</sup> Usually present as a disinfection by product (DBP), therefore  
 8 encompassed by the DBP rule in the US; <sup>E</sup> On the US EPA list of national secondary drinking water regulations, these are  
 9 recommendations, they are not binding.

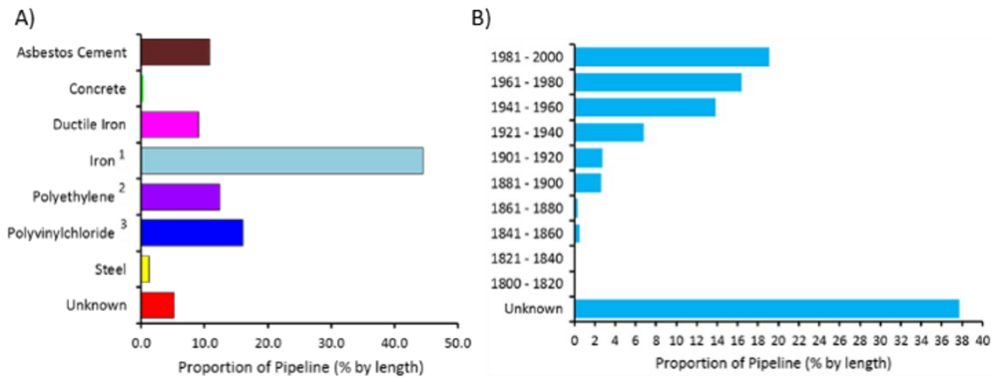

10

11 **Figure S 1 Diversity of ages and materials of pipelines within DWDS.** A) Materials comprising the  
 12 pipelines, <sup>1</sup>Includes cast, galvanised, spun and grey, <sup>2</sup>Polyethylene and <sup>3</sup>Polyvinylchloride contain  
 13 various sub groups, copper, glass reinforced plastic and lead are not shown as they accounted for  
 14  $\leq 0.089\%$  and thus no data points were visible due to the x-axis scale; B) Dates (in years) between  
 15 which pipeline was laid. All data plotted is taken from UKWIR <sup>5</sup> and is therefore based upon U.K.  
 16 systems.
